# Supplementary material
Source: Elsevier journal article supplement (https://comptes-rendus.academie-sciences.fr/biologies/article/10.1016/j.crvi.2016.03.004/file/attach/mmc1.pdf)
Supplement: mmc1 [file mmc1.pdf]

| Sampling locations<br>(km - location from the<br>mouth of the estuary)   | Sampling<br>Date                                                                | Sample<br>size for genetic<br>analysis <sup>a</sup> | Sample<br>size for genetic<br>analysis<br>according to<br>Winkler et al.<br>2011 | Sample<br>size for<br>morphological<br>analysis <sup>b</sup> | Latitude                                   | Longitude                                  |
|--------------------------------------------------------------------------|---------------------------------------------------------------------------------|-----------------------------------------------------|----------------------------------------------------------------------------------|--------------------------------------------------------------|--------------------------------------------|--------------------------------------------|
| Elbe estuary<br>Este (*90 km)<br>Brunsbüttel (*30 km)                    | March 2006<br>March 2006                                                        |                                                     | 32<br>8                                                                          | 50                                                           | 53°32'06 N<br>53°53'24 N                   | 09°47'31 E<br>09°08'44 E                   |
| Scheldt estuary<br>1 (58 km)<br>4 (79 km)<br>9 (111 km)                  | April 2006<br>April 2006<br>April 2006                                          |                                                     | 27<br>5<br>14                                                                    |                                                              | 51°21'06 N<br>51°13'42 N<br>51°05'31 N     | 04°14'58 E<br>04°23'86 E<br>04°10'54 E     |
| Scheldt River<br>Antwerp<br>Duaene                                       | April 2011;<br>April 2011                                                       | 7<br>1                                              |                                                                                  |                                                              | 51°13'42 N<br>51°N                         | 04°23'86 E<br>04°E                         |
| Seine estuary<br>Tancarville (*28 km)<br>Tancarville (*28 km)<br>1<br>2  | May 2006<br>April 2011<br>May 2008<br>July 2008                                 | 37                                                  | 38                                                                               | 10<br>8<br>9                                                 | 49°28'33 N<br>49°28'33 N<br>49° N<br>49° N | 00°27'54 W<br>00°27'54 W<br>00° W<br>00° W |
| Tamar Estuary<br>1(*8 km)                                                | July 2006                                                                       |                                                     | 5                                                                                |                                                              | 50° N                                      | 04° E                                      |
| Gulf of Riga<br>St. 163, 0–9 m<br>St. 165, 0–8 m<br>City Port            | June 2006<br>June 2006<br>Aug. 2008                                             | 14                                                  | 1<br>4                                                                           | 29                                                           | 57° N<br>57° N<br>57° 04' 44N              | 23° E<br>23° E<br>23°04'44E                |
| Gulf of Finland:<br>Gulf of Vyborg<br>Neva R. estuary<br>Luga R. estuary | Sep. 2007, Aug.<br>2009<br>Aug. 2009,<br>Aug. 2010<br>Jun. 2006 to<br>Sep. 2010 | 35<br>2<br>30                                       |                                                                                  | 37                                                           | 60° 23'39N<br>59° 32'36N<br>59° 24'13N     | 28° 26'74E<br>29° 28'17E<br>28° 11'06E     |
| Vistula Lagoon                                                           | Oct. 2007                                                                       | 5                                                   |                                                                                  | 30                                                           | 54° 65'02N                                 | 20° 23'37E                                 |

|                                                                        |                                                                 |    |               |              |                                        |                                        |
|------------------------------------------------------------------------|-----------------------------------------------------------------|----|---------------|--------------|----------------------------------------|----------------------------------------|
| Swedish coast<br>B1<br>H4                                              | July 2006<br>July 2006                                          |    | 9<br>22       |              | 58°44'28 N<br>58°59'07 N               | 17°37'60 E<br>17°43'60 E               |
| Loire estuary<br>Paimboeuf (*17 km)<br>St.1<br>St.2                    | April 2006<br>April 2011<br>July 2009                           | 52 | 22            | 10<br>9      | 47°17'23 N                             | 02°01'52 W                             |
| Gironde estuary<br>2(*12 km)<br>E(*48 km)<br>K(*70 km)<br>St.1<br>St.3 | April 2006<br>April 2006<br>April 2006<br>May 2005<br>July 2009 |    | 28<br>5<br>29 | 5<br>10<br>4 | 45°31'00 N<br>45°14'80 N<br>45°04'10 N | 01°57'00 W<br>00°43'50 W<br>00°38'30 W |
| Lake in the Bois de<br>Boulogne (Paris)                                | July 2010                                                       | 3  |               |              | 48° 51' 48 N                           | 2° 15' 07 E                            |

<sup>a</sup>Number of individuals sequenced per location

<sup>b</sup>Number of individuals analyzed with morphological method
